# Supplementary material
Source: publisher figshare collection journal article supplement (https://acs.figshare.com/ndownloader/files/4214674)
Supplement: Supplementary file 1 [file 4214674]

## **Speciation and Degradation of Triphenyltin in Typical Paddy Fields and its Uptake into Rice Plants**

Fabiane G. Antes<sup>a</sup>, Eva Krupp<sup>b,c\*</sup>, Erico M. M. Flores<sup>a</sup>, Valderi L. Dressler<sup>a\*</sup>, Joerg Feldmann<sup>b</sup>

<sup>a</sup> *Departamento de Química, Universidade Federal de Santa Maria, 97105-900 Santa Maria, RS, Brazil*

<sup>b</sup> *Department of Chemistry, University of Aberdeen, Meston Building, Meston Walk, AB24 3TU, Aberdeen, U.K.*

<sup>c</sup> *ACES Aberdeen Centre for Environmental Sustainability, University of Aberdeen, AB 23 3UU, Aberdeen, UK*

### **Nutrient solution used for rice plants**

For preparation of the Yoshida solution, the micronutrients shown in Table S1 were dissolved separately, then mixed with 100 mL of concentrated sulfuric acid and diluted with water to 2 L. Three aliquots of 1.25 mL of each of 6 solutions shown in Table S1 was combined with three different amounts of TPhT and filled up to 1 L resulting in 10, 100 and 1000  $\mu\text{g kg}^{-1}$  TPhT Yoshida solution. The pH of the prepared solution was adjusted to 5.5 with NaOH. Separate trays were used for each plant. Each tray was filled with 50 ml of 50 TPhT Yoshida solution once a week, and filled up with water as necessary. Twice a week, only Yoshida solution (without TPhT) was added. Every week fresh Yoshida solution was prepared.

**Table S1.** Micronutrients used for preparation of Yoshida Solution.

|                                                                     | 2L (g) | 500 mL (g) | 250 mL (g) |
|---------------------------------------------------------------------|--------|------------|------------|
| 1. $\text{NH}_4\text{NO}_3$                                         | 182.8  | 45.7       | 22.85      |
| 2. $\text{NaH}_2\text{PO}_4 \cdot 2\text{H}_2\text{O}$              | 80.6   | 20.15      | 10.075     |
| 3. $\text{K}_2\text{SO}_4$                                          | 142.8  | 35.7       | 17.85      |
| 4. $\text{CaCl}_2$                                                  | 177.2  | 44.3       | 22.15      |
| 5. $\text{MgSO}_4 \cdot 7\text{H}_2\text{O}$                        | 648    | 162        | 81         |
| 6. Micro nutrient                                                   |        |            |            |
| $\text{MnCl}_2 \cdot 4\text{H}_2\text{O}$                           | 3      | 0.75       | 0.375      |
| $(\text{NH}_4)_6\text{HO}_7\text{O}_{24} \cdot 4\text{H}_2\text{O}$ | 0.148  | 0.037      | 0.0185     |
| $\text{H}_3\text{BO}_3$                                             | 1.868  | 0.467      | 0.2335     |
| $\text{ZnSO}_4 \cdot 7\text{H}_2\text{O}$                           | 0.07   | 0.0175     | 0.00875    |
| $\text{CuSO}_4 \cdot 5\text{H}_2\text{O}$                           | 0.062  | 0.0155     | 0.00775    |
| $\text{FeCl}_3 \cdot 6\text{H}_2\text{O}$                           | 15.4   | 3.85       | 1.925      |
| citric acid monohydrate                                             | 23.8   | 5.95       | 2.975      |

### Mesocosm experiment

The total amount of TPhT added each mesocosm after seven weeks was calculated, as  $\mu\text{g}$  of Sn and is shown in Table S2.

**TABLE S2.** Total amount of TPhT (as Sn) added to each mesocosm after seven weeks.

| Groups  | Amount of TPhT added to each mesocosm,<br>μg |
|---------|----------------------------------------------|
| Control | -                                            |
| Low     | 8.0                                          |
| Medium  | 72                                           |
| High    | 373                                          |

### **Speciation of Sn compounds using GC-ICP-MS**

After the extraction procedures used for soil and plant parts, the extracts were transferred to 2 mL autosampler vials and stored at -80 °C. For analysis by GC-ICP-MS, 1 μL was injected. The ICP-MS and chromatographic parameters are described in Table S3.

**TABLE S3.** GC-ICP-MS operating parameters.

| <b>Instrumentation</b>   |                                                                                                           |
|--------------------------|-----------------------------------------------------------------------------------------------------------|
| GC                       | 6890 GC                                                                                                   |
| Inlet                    | On column                                                                                                 |
| Detector                 | ICP-MS 7500c Agilent                                                                                      |
| Column                   | 30 m x 0.53 mm id x 1.0 $\mu$ m CPSIL-5CB                                                                 |
| <b>GC conditions</b>     |                                                                                                           |
| Inlet temperature        | 300 °C                                                                                                    |
| Injection volume         | 1 $\mu$ L                                                                                                 |
| Carrier gas              | nitrogen                                                                                                  |
| Carrier gas pressure     | 60 psi                                                                                                    |
| Transferline temperature | 270 °C                                                                                                    |
| Oven temperature         | 60 °C/1 min, 40 °C min <sup>-1</sup> to 250 °C, 60 °C min <sup>-1</sup> to 350 °C, program hold for 3 min |
| <b>ICP-MS conditions</b> |                                                                                                           |
| Power                    | 1570 W                                                                                                    |
| Carrier gas flow         | 0.60 L min <sup>-1</sup>                                                                                  |
| Make up gas flow         | 0.60 L min <sup>-1</sup>                                                                                  |
| Isotopes acquired        | <sup>118</sup> Sn, <sup>120</sup> Sn                                                                      |

Analyte recoveries using different extraction procedures are shown in Table S4. Chromatograms obtained for spiked soil and plant material are shown in Figure S1.

**Table S4.** Analyte recoveries, in %, obtained for extraction procedure A, B and C, in plant material (using procedure A and C) and soil samples (using procedures A, B and C). Uncertainties represent the mean and standard deviation of 3 extractions.

| Specie | Procedure A |            | Procedure B | Procedure C |            |
|--------|-------------|------------|-------------|-------------|------------|
|        | Soil        | Plant      | Soil        | Soil        | Plant      |
|        | material    |            |             | material    |            |
| MPhT   | 73.7 ± 6.3  | 97.1 ± 4.9 | 94.0 ± 5.4  | 70.2 ± 6.8  | 76.8 ± 7.1 |
| DPhT   | 84.9 ± 5.6  | 94.3 ± 5.2 | 98.1 ± 5.1  | 64.9 ± 5.7  | 80.2 ± 5.4 |
| TPhT   | 85.4 ± 5.2  | 96.5 ± 6.6 | 97.0 ± 4.5  | 59.7 ± 8.0  | 61.3 ± 4.9 |

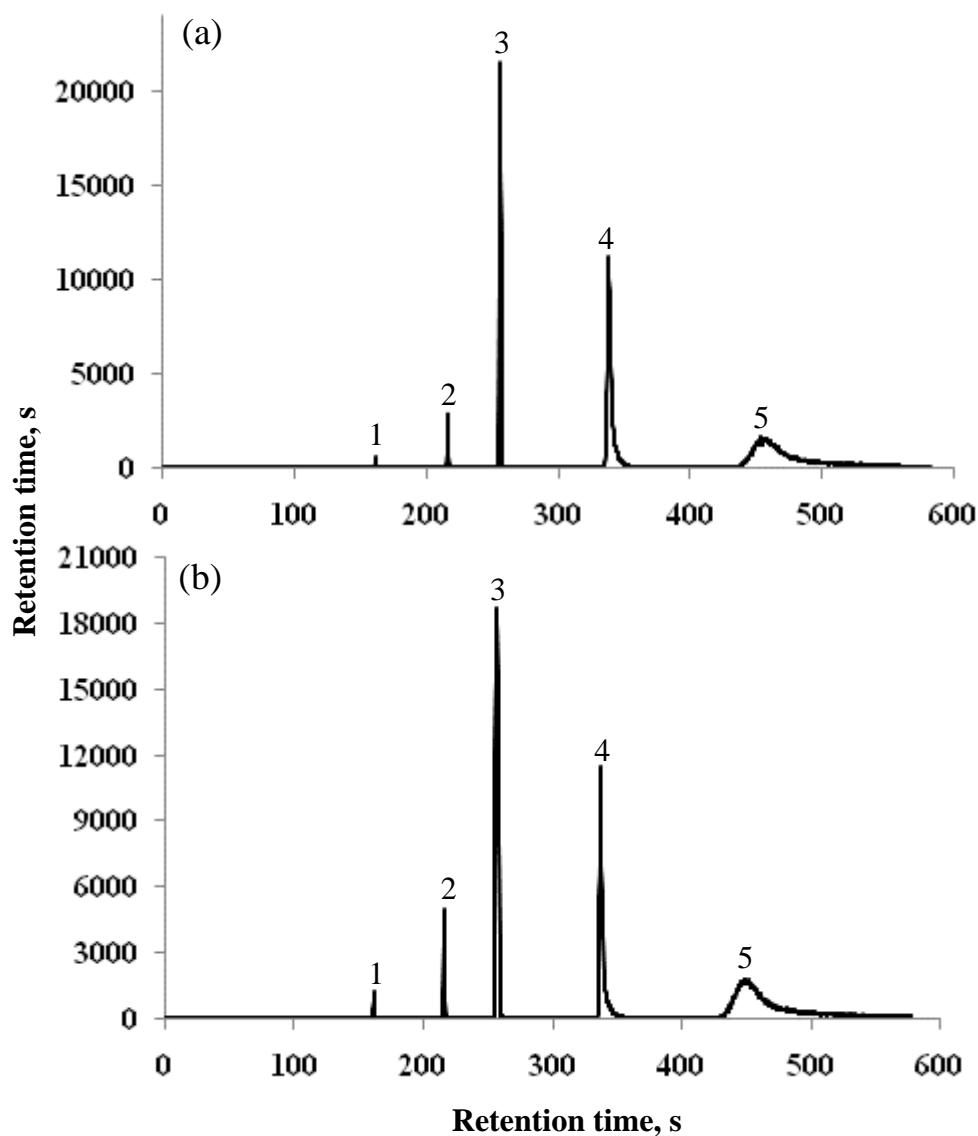

**FIGURE S1.** Chromatograms obtained by GC-ICP-MS for enriched soil (a) and plant material samples (b). Peak 1: inorganic Sn; 2: TPrT; 3: MPhT; 4: DPhT; 5: TPhT.

#### **Analysis of commercial TPhT hydroxide**

According to Brazilian legislation,<sup>1</sup> TPhT hydroxide can be used as biocide in several crops, including rice. Before speciation analysis of soil obtained from a natural rice field, the commercial product Mertin 400 was analysed. A sample was diluted by a factor of 4000000, derivatized using NaBEt<sub>4</sub> and 1  $\mu$ L was injected into GC. The results obtained for phenyltin species are shown in **Table S5**.

**Table S5.** Concentration of phenyltin species in commercial TPhT hydroxide. Results represent the mean and standard deviation for 3 diluted samples.

| Specie | Concentration, g L <sup>-1</sup> |
|--------|----------------------------------|
| MPhT   | < 0.001                          |
| DPhT   | 1.12 ± 0.03                      |
| TPhT   | 365 ± 8                          |

### Unidentified tin species

A correlation of boiling point or number of carbons *versus* retention time of chromatographic separation of standards can be used to assign unknown species.<sup>2</sup> A good correlation ( $R^2 = 0.99$ ) was obtained from correlation of retention times of inorganic tin, TPrT, MPhT, DPhT and TPhT (160, 219, 257, 339, 450 s, respectively) *versus* their respective number of carbons (8, 11, 12, 16, 20, respectively), as can be observed in Figure S2.

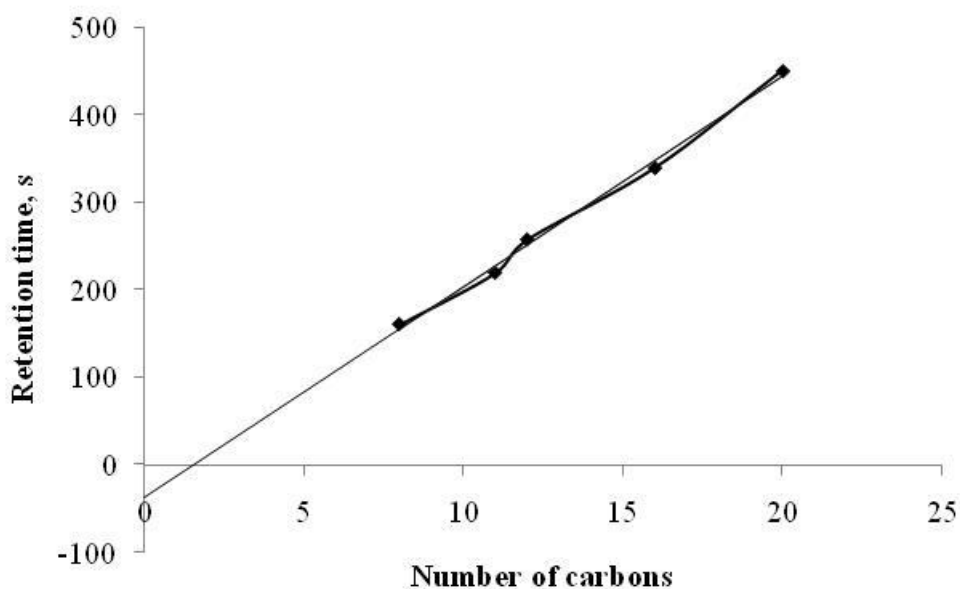

**Figure S2.** Retention time (RT) *versus* number of carbons (NC) of tin species ( $RT = 24.10 \cdot NC - 38.01$ ;  $R^2 = 0.9954$ ).

The equation obtained from correlation shown in Figure S2 was used to calculate the number of carbons of unknown tin species observed in chromatograms obtained from soil and roots of rice plants exposed to TPhT. From the number of carbons obtained, tin species were suggested, as described in Table 4.



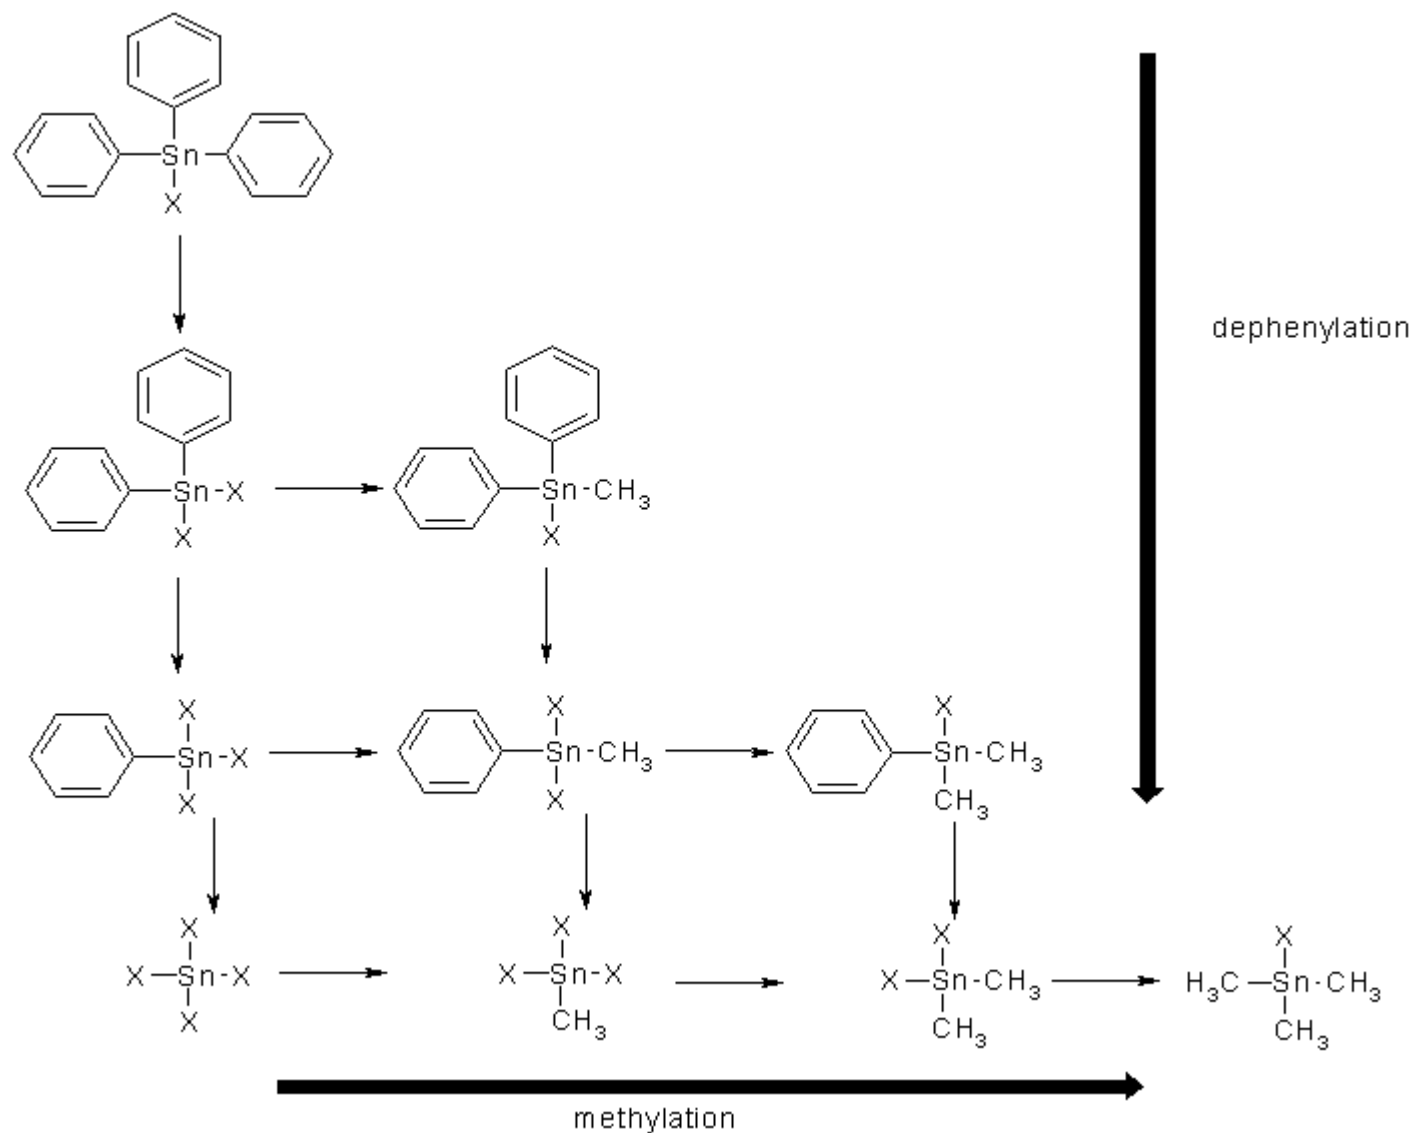

**Figure S3:** Degradation pattern of TPhT in the paddy soils, which undergoes stepwise dephenylation. Every phenyltin can however be methylated to give the mixed phenylmethyltin species. All except monomethyltin have been tentatively identified and quantified in the rice paddies and roots of the rice plants.

- 
1. Ministério da Agricultura, <http://extranet.agricultura.gov.br>.
  2. Mitra, S. K., Jiang, K. J., Haas, K., Feldmann, J., Municipal landfills exhale newly formed organotins. *J. Environ. Monit.* **2005**, 7, 1066-1068; DOI: 10.1039/b511767d.
